1 **Chitosan primes plant defence mechanisms against *Botrytis***  
2 ***cinerea*, including expression of Avr9/Cf-9 rapidly-elicited genes**

3  
4 **Daniel De Vega<sup>1</sup>, Nicola Holden<sup>1</sup>, Pete E Hedley<sup>1</sup>, Jenny Morris<sup>1</sup>, Estrella Luna<sup>2\*</sup> and**  
5 **Adrian Newton<sup>1\*</sup>**

6  
7 <sup>1</sup>The James Hutton Institute, Invergowrie, Dundee DD2 5DA, UK

8 <sup>2</sup>School of Bioscience, University of Birmingham, Edgbaston B15 2TT, UK

9  
10 \*Authors for correspondence: [e.lunadiez@bham.ac.uk](mailto:e.lunadiez@bham.ac.uk) (+44 (0)1214148699) and  
11 [adrian.newton@hutton.ac.uk](mailto:adrian.newton@hutton.ac.uk) (+44 (0)344 928 5428)

12  
13 **Funding Information:** AHDB (HDC) Studentship CP105, BBSRC Future Leader Fellowship  
14 BB/P00556X/1 and BB/P00556X/2

15

16

17

18

19

20

21

22

23

24

25

## 26 **Abstract**

27 Current crop protection strategies against the fungal pathogen *Botrytis cinerea* rely on a  
28 combination of conventional fungicides and host genetic resistance. However, due to  
29 pathogen evolution and legislation in the use of fungicides, these strategies are not sufficient  
30 to protect plants against this pathogen. Defence elicitors can stimulate plant defence  
31 mechanisms through a phenomenon known as priming. Priming results in a faster and/or  
32 stronger expression of resistance upon pathogen recognition by the host. This work aims to  
33 study priming of a commercial formulation of the elicitor chitosan. Treatments with chitosan  
34 result in induced resistance in solanaceous and brassicaceous plants. In tomato plants,  
35 enhanced resistance has been linked with priming of callose deposition and accumulation of  
36 the plant hormone jasmonic acid (JA). Large-scale transcriptomic analysis revealed that  
37 chitosan primes gene expression at early time-points after infection. In addition, two novel  
38 tomato genes with a characteristic priming profile were identified, Avr9/Cf-9 rapidly-elicited  
39 protein 75 (*ACRE75*) and 180 (*ACRE180*). Transient and stable overexpression of *ACRE75*,  
40 *ACRE180* and their *Nicotiana benthamiana* homologs, revealed that they are positive  
41 regulators of plant resistance against *B. cinerea*. This provides valuable information in the  
42 search for strategies to protect Solanaceae plants against *B. cinerea*.

43

## 44 **Keywords**

45 Chitosan, *Botrytis cinerea* (Grey mould), Callose, Induced Resistance, Priming, *Solanum*  
46 *lycopersicum* (tomato), Solanaceae, Transcriptomics

47

48

49

## 50 **Introduction**

51

52 Crop yield losses of 20-40% of total agriculture productivity can be attributed to pests and  
53 diseases (Oerke, 2006, Savary et al., 2012). Of these threats, the pathogen *Botrytis cinerea*  
54 causes annual losses of \$10-\$100 billion, as it reduces crop yield before harvest or leads to  
55 waste and spoilage post-harvest. It is the causative agent of grey mould disease in tomato and  
56 many other economically important crops, such as pepper, aubergine, grape, lettuce and  
57 raspberry. *B. cinerea* is a fungal generalist (broad-host range) and considered to be a model  
58 necrotrophic pathogen (Williamson et al., 2007). Effective control include the use of  
59 conventional crop protectants (e.g. fungicides) and resistant varieties as well as sanitation and  
60 environmental control. However, rapid pathogen evolution can result in the loss of efficacy of  
61 resistance sources and fungicides (Pappas, 1997, Williamson et al., 2007). In addition, the use  
62 of pesticides is strictly limited by European regulations due to human health and environment  
63 risk and hazard assessment changes. New alternative strategies are therefore needed.  
64 Exploiting the plant's defence system to provide protection against these threats has emerged  
65 as a potential strategy against pathogen infection and disease (Luna, 2016).

66

67 Plant endogenous defences is activated by elicitor molecules resulting in induced resistance  
68 (IR) (Mauch-Mani et al., 2017), since they are able to mimic pathogen-inducible defence  
69 mechanisms (Aranega-Bou et al., 2014). Induced resistance works via two different  
70 mechanisms: direct activation of systemic plant defences after signal recognition and;  
71 priming, a mechanism that initiates a wide reprogramming of plant processes, considered to  
72 be an adaptive component of induced resistance (Mauch-Mani et al., 2017). Priming has been  
73 demonstrated to be the most cost-effective mechanism of induced resistance in terms of plant  
74 development as there is no direct relocation of plant resources from growth to defence until it

75 is necessary (van Hulten et al., 2006). Studies have already shown that low elicitor doses can  
76 enhance resistance to pests without interfering with crop production (Redman et al., 2001).  
77 Elicitor-induced priming has been demonstrated to last from a few days (Conrath et al., 2006)  
78 to weeks (Worrall et al., 2012) after treatment and even through subsequent generations  
79 (Ramírez-Carrasco et al., 2017, Slaughter et al., 2012).

80

81 Priming can have multiple effects on plant defences, which vary depending on the type of  
82 plant-pathogen interaction. Defence priming enables the plant to fine-tune immunity  
83 responses through enhancement of the initial defences. These is achieved through different  
84 mechanisms that act at specific defence layers (Mauch-Mani et al., 2017). For instance, cell-  
85 wall fortification and effective production of reactive oxygen species (ROS) has been used as  
86 a marker for the expression of priming responses. Hexanoic acid (Hx) primes cell-wall  
87 defences through callose deposition and redox processes in tomato cultivars against *B.cinerea*  
88 (Aranega-Bou et al., 2014). In *Arabidopsis thaliana*, BABA and benzothiadiazole (BTH)-  
89 induced priming is also based on an increase in callose deposition (Kohler et al., 2002, Ton et  
90 al., 2005). Priming also results in transcriptomic changes. Gene expression analysis of *A.*  
91 *thaliana* after BABA treatment was used to identify a transient accumulation of SA-  
92 dependent transcripts, including that of *NPRI*, which provides resistance against  
93 *Pseudomonas syringae* (Zimmerli et al., 2000). Changes in metabolite accumulation have  
94 been shown to mark priming of defence also. For instance, defence hormone profiling has  
95 shown that accumulation of JA and JA-derivatives mediates priming of mycorrhizal fungi  
96 (Pozo et al., 2015). Moreover, untargeted metabolomic analysis have identified different  
97 compounds, including kaempferol (Król et al., 2015), quercetin, and indole 3 carboxylic acid  
98 (I3CA) (Gamir et al., 2014), that drive priming responses.

99

100 Several elicitors have been described to induce resistance mechanisms in tomato against *B.*  
101 *cinerea*. For instance, BABA has been demonstrated to provide long-lasting induced  
102 resistance against *B. cinerea* in leaves (Luna et al., 2016) and in fruit (Wilkinson et al., 2018).  
103 In addition, the plant defence hormone JA has also been linked to short-term and long-term  
104 induced resistance in tomato against *B. cinerea* (Luna et al., 2016, Worrall et al., 2012). To  
105 date, however, few studies have investigated elicitor-induced priming in tomato against *B.*  
106 *cinerea*. One of them showed that Hx-induced priming is based on callose deposition, the  
107 expression of tomato antimicrobial genes (e.g. protease inhibitor and endochitinase genes),  
108 and the fine-tuning of redox processes (Aranega-Bou et al., 2014, Finiti et al., 2014).  
109 Therefore, evidence is building in tomato, that induced resistance against *B. cinerea* can be  
110 based on priming also.

111

112 In this study we investigated whether the chitin de-acetylated derivative, chitosan, triggers  
113 priming of defence in tomato against *B. cinerea*. Chitosan as a plant protection product is  
114 considered ‘generally recognised as safe’ (Raafat and Sahl, 2009) that is effective in  
115 protecting strawberry, tomato and grape against *B. cinerea* (Muñoz and Moret, 2010,  
116 Romanazzi et al., 2013). Different studies have shown that its effect on crop protection  
117 results from induction of defence mechanisms (Sathiyabama et al., 2014) and direct  
118 antimicrobial activity (Goy et al., 2009). However, treatments with chitosan require  
119 infiltration into the leaves to trigger a robust effect (Scalschi et al., 2015) making it an  
120 unsuitable method of application in large-scale experiments or studies that take into  
121 consideration first barrier defence strategies. Here, we have addressed whether treatment with  
122 a water-soluble formulation of chitosan results in induced resistance phenotypes and in  
123 priming of cell wall defence and defence hormone accumulation. In addition, whole-scale  
124 transcriptome analysis was performed to identify candidate genes that are driving expression

125 of priming. Our findings, together with the outlined characteristics of chitosan, make this  
126 substance a suitable candidate for extensive application as a component of Integrated Pests  
127 (and disease) Management (IPM) for the protection of crops against fungal pathogens.

128

## 129 **Material and Methods**

130

### 131 **Plant material and growth conditions**

132 Tomato cv. Money-maker seeds were used in the described experiments. Unless otherwise  
133 specified, seeds were placed into propagator trays containing Bulrush peat (Bulrush pesticide-  
134 free black peat, low nutrient and low fertilizer mix) and a top layer of vermiculite and left at  
135 20 °C until germination. Germinated seeds were transplanted to individual pots containing  
136 Bulrush soil (pesticide-free compost mix and nutrient and fertilizer rich) in a growth cabinet  
137 for 16h - 8h / day-night and 23°C / 20°C cycle C at  $\sim 150 \mu\text{E m}^{-2} \text{ s}^{-1}$  at  $\sim 60\%$  relative  
138 humidity (RH). *Nicotiana benthamiana* seeds were cultivated in a similar manner specified  
139 for tomato for 16h - 8h/ day-night cycle; 26°C / 22°C at  $\sim 150 \mu\text{E m}^{-2} \text{ s}^{-1}$  at  $\sim 60\%$  relative  
140 humidity (RH). Aubergine (*Solanum melongena*) cv. Black Beauty seeds were placed into  
141 propagators containing Bulrush peat and a layer of vermiculite on the top and incubated at  
142 20°C for 1-2 weeks until germination. Seedlings were then transplanted to individual pots  
143 containing Bulrush soil and grown and cultivated as for tomato. *Arabidopsis thaliana*  
144 (hereafter referred to as Arabidopsis) Columbia-0 (Col-0) and transgenic lines were grown in  
145 a soil mixture of 2/3 Levington M3 soil and 1/3 sand for 8h - 16h/day - night and 21°C / 18°C  
146 cycle at  $\sim 150 \mu\text{E m}^{-2} \text{ s}^{-1}$  at  $\sim 60\%$  RH. Ten-day-old plants were transplanted to individual  
147 pots.

148

### 149 **Chemical treatment**

150 All experiments were performed using a commercial, water-soluble chitosan formulation,  
151 known as ChitoPlant (ChiPro GmbH, Bremen, Germany) (Romanazzi et al., 2013, Younes et  
152 al., 2014). ChitoPlant, referred to as chitosan latterly, was freshly prepared in water to the  
153 specific concentrations (please see figure legends for details). Treatments were performed by  
154 foliar spraying of chitosan solution (with 0.01% Tween20) directly onto leaves.

155

### 156 ***Botrytis cinerea* cultivation, infection and scoring**

157 *B. cinerea* R16 (Faretra and Pollastro, 1991) was used in all experiments and was kindly  
158 provided by Dr Mike Roberts (Lancaster University). Cultivation of the fungus and infection  
159 of tomato-based experiments were performed as described (Luna et al., 2016). For *N.*  
160 *benthamiana*, 2-3 detached leaves were inoculated with 6µl inoculum solution containing 2 x  
161 10<sup>4</sup> spores/ml of *B. cinerea*. Infected leaves were kept at 100% RH by sealing the trays and  
162 placed in the dark before disease assessment. Arabidopsis infections were performed as  
163 previously described (La Camera et al., 2011) with a few modifications. Leaves were  
164 inoculated with 5µl inoculum solution containing ½ strength of potato dextrose broth (PDB –  
165 Difco at 12 g/l) and 5 x 10<sup>5</sup> spores/ml. Infected Arabidopsis plants were put in a sealed tray at  
166 100% RH and moved back to the growth cabinet. Infections of *S. melongena* plants were  
167 performed by drop inoculating detached leaves with a spore solution of *B. cinerea* containing  
168 2 x 10<sup>4</sup> spores/ ml. For all pathosystems, disease was scored by measuring lesion diameters  
169 with an electronic calliper (0.1 mm resolution) on different days post infection.

170

### 171 **Plant growth analysis**

172 Relative growth rate (RGR) was used to analyse tomato growth after chitosan treatment as  
173 described (Luna et al., 2016). Growth analysis of Arabidopsis plants was performed by  
174 measuring rosette perimeter using Photoshop CS5 (Vasseur et al., 2018).

175

176

177 **Callose deposition assays**

178 For analysis of callose deposition after chitosan treatment, material from tomato and  
179 Arabidopsis plants with different concentrations of chitosan were collected 1 day after  
180 treatment (dat) and placed in 96% (v/v) ethanol in order to destain leaves. Aniline blue was  
181 used to stain callose deposits as described previously (Luna et al., 2011). Analysis of callose  
182 associated with the infection by *B. cinerea* in tomato leaves was performed as described  
183 (Rejeb et al., 2018) with some modifications. Briefly, infected tomato leaf samples were  
184 collected and placed in 96% (v/v) ethanol 1 day after infection with *B. cinerea* and allowed to  
185 destain. Destained material was hydrated with 0.07 M phosphate buffer (pH 9.0) for 30 min  
186 and then incubated for 15 min in 0.1% (w/v) aniline blue (Sigma-Aldrich) and 0.005% (w/v)  
187 fluorescent brightener (Sigma-Aldrich). Solutions were then replaced with 0.1% (w/v) aniline  
188 blue and incubated for 24h in the dark prior to microscopic analysis. All observations were  
189 performed using an UV-epifluorescence microscope (GXM-I2800 with GXCAM HiChrome-  
190 MET camera). Callose was quantified from digital photographs by the number of yellow  
191 pixels (callose intensity). Infection-associated callose was scored and analysed in a similar  
192 way but callose intensity was expressed relative to fungal lesion diameters. Image analyses  
193 were performed with Photoshop CS5 and ImageJ.

194 **Chitosan antifungal activity *in vitro* assay**

195 *B. cinerea* mycelial growth assessment was performed using Potato Dextrose Agar (PDA) as  
196 culture media with different concentrations of chitosan (1%, 0.1%, 0.01% w/v). PDA was  
197 autoclaved and then chitosan and the fungicide Switch (as positive fungicide control) (1%,  
198 0.1%, 0.01% w/v) were added directly to PDA as it cooled. One 5 mm diameter agar plugs of  
199 actively growing *B. cinerea* mycelium was added per plate. Five plates per treatment were



200 sealed with parafilm and then incubated under controlled conditions (darkness and 24°C).  
201 After 4 days, the mean growth of the fungus was determined by measuring two perpendicular  
202 diameters and calculating the mean diameter.

### 203 **High-Pressure Liquid Chromatography (HPLC) - Mass Spectrometry (MS)**

204 Healthy and infected tomato leaf tissues were harvested in liquid nitrogen and subsequently  
205 freeze-dried for 3 days. Freeze-dried samples were ground in 15 mL Falcon tubes containing  
206 a tungsten ball in a bead beater. Ten mg of each sample was used for hormone extraction.  
207 Sample extraction, HPLC-MS quantitative analysis of plant hormones and data analysis were  
208 performed as described (Forcat et al., 2008). Accurate quantification of ABA, SA and JA  
209 used the deuterated internal standards added during sample extraction (Forcat et al., 2008)  
210 and concentrations were calculated using standard concentration curves. Relative  
211 accumulation of jasmonic acid-isoleucine (JA-Ile) were obtained by calculations of % peak  
212 areas among samples.

### 213 **Transcriptome analysis**

214 Four conditions were analysed using microarrays: (i) ddH<sub>2</sub>O-treated and non-infected plants  
215 (Water + Mock); (ii) Chitosan-treated and non-infected plants (Chitosan + Mock); (iii)  
216 ddH<sub>2</sub>O-treated and *B. cinerea*-infected plants (Water + *B. cinerea*); (iv) Chitosan-treated and  
217 *B. cinerea*-infected plants (Chitosan + *B. cinerea*). Inoculations were performed four days  
218 after treatment (dat) with chitosan, and leaf discs from four independent plants (biological  
219 replicates) per treatment were sampled at 6, 9 and 12 h post-inoculation (hpi) with mock or *B.*  
220 *cinerea* spores. Total RNA was extracted with an RNeasy Plant Mini Kit (Qiagen) as  
221 recommended. A custom 60-mer oligonucleotide microarray was designed using eArray  
222 (<https://earray.chem.agilent.com/earray/>; A-MTAB-667 and E-MTAB-8868;  
223 [www.ebi.ac.uk/arrayexpress/](http://www.ebi.ac.uk/arrayexpress/)) from predicted transcripts (34,616 in total) of the *S.*

224 *lycopersicum* (ITAG 2.3) genome. Experimental design is detailed at E-MTAB-8868;  
225 [www.ebi.ac.uk/arrayexpress/](http://www.ebi.ac.uk/arrayexpress/). Two-channel microarray processing was utilised, according to  
226 the Low Input Quick Amp Labelling Protocol v. 6.5 (Agilent). Microarray images were  
227 imported into Feature Extraction software (v. 10.7.3.1; Agilent) and data extracted using  
228 default parameters. Data were subsequently imported into Genespring software (v. 7.3;  
229 Agilent) for subsequent pre-processing and statistical analysis. Following Lowess  
230 normalisation, data were re-imported as single-colour data. Data were filtered to remove  
231 probes that did not have detectable signal in at least 3 replicates, leaving 22,381 probes for  
232 statistical analysis.

233

234 Analysis of Variance (2-way ANOVA; p-value  $\leq 0.01$ , Benjamini-Hochberg false discovery  
235 rate correction) was used to identify differentially expressed genes (DEGs) for the factors  
236 ‘Treatment’ (3,713 DEGs), ‘Time’ (6,920), and ‘Treatment-Time interaction’ (186).  
237 Subsequently, pairwise Student’s T-tests were performed (Volcano plots: P-value  $\leq 0.05$ , 2-  
238 fold cut-off) on the global set of 8,471 DEGs for each of the three test treatments (Chitosan +  
239 Mock, Water + Mock and Chitosan + *B. cinerea*) compared to control (Water + Mock) at  
240 each time point. Venn diagrams were used at each time point to identify common and specific  
241 DEGs.

242

### 243 **Panther gene ontology (GO) term enrichment analysis**

244 Panther software (Thomas et al., 2003) was used to visualise DEG products in the context of  
245 biological pathways and/or molecular functions, using default settings. Functional enrichment  
246 analysis was performed using DEG lists for Chitosan + *B. cinerea* and Water + *B. cinerea*  
247 treatments at 6 hpi. ‘Biological processes’ and ‘molecular functions’ were selected using

248 PANTHER Overrepresentation Test (release 20170413) against *S. lycopersicum* (all genes in  
249 database) and Bonferroni correction for multiple testing.

250

### 251 **DEG transcript co-expression analysis**

252 Two-way ANOVA was performed on the filtered microarray dataset at increased stringency  
253 (p-value  $\leq 0.01$ , Bonferroni false discovery rate correction) to identify 1,722 highly-  
254 significant DEGs. Pearson's correlation was used with default settings in Genespring (v 7.3)  
255 to generate a heatmap to help identify co-expressed transcripts (Figure 3b).

256

### 257 **Gene expression analysis**

258 Validation of *S. lycopersicum* transcriptomic analysis was performed by qRT-PCR of nine  
259 candidate differentially expressed genes (DEGs), comparing gene expression values with  
260 microarray. RNA samples were DNase-treated with TurboDnase (ThermoFisher) and  
261 complementary DNA (cDNA) was synthesized from 2.5  $\mu\text{g}$  total RNA using Superscript III  
262 reverse transcriptase (Invitrogen) as recommended with random hexamer/oligo dT primers.  
263 RT-qPCR reactions were performed with specific *S. lycopersicum* oligonucleotide primers  
264 (Table S4) purchased from Sigma-Aldrich. Gene primers and probes were designed using  
265 Universal Probe Library (UPL) assay design centre (Roche Diagnostics Ltd.). RT-qPCR was  
266 performed using FastStart Universal Probe Master Mix (Roche) and expression was  
267 calculated against two reference genes (*SlActin-like* and *SlUbiquitin*) using the Pfaffl method  
268 (Pfaffl, 2001).

269

### 270 **Gene cloning**

271 Orthologues of *SIACRE75* and *SIACRE180* were obtained from CDS and protein sequences  
272 BLAST analysis against Arabidopsis genome (TAIR10) for Arabidopsis sequences, or a  
273 reciprocal best BLAST hits (RBH) (Ward and Moreno-Hagelsieb, 2014) test was performed  
274 (Sol Genomics Network) for *N. benthamiana*, termed *NbACRE75* and *NbACRE180*,  
275 respectively. Best CDS and protein hits were identified, being Niben101Scf03108g12002.1  
276 and Niben101Scf12017g01005.1 for *SIACRE75* and *SIACRE180* respectively; termed  
277 *NbACRE75* and *NbACRE180* onwards. Flanking the (i) *SIACRE75*, (ii) *SIACRE180*, (iii)  
278 *NbACRE180* and (iv) *NbACRE75* coding sequences (CDS), Gateway® cloning was used to  
279 design and produce overexpression constructs for the gene candidates for a N-terminal  
280 GFP:ACRE fusion protein per insert (Reece-Hoyes and Walhout, 2018). Briefly, pUC57  
281 plasmids containing *SIACRE75*, *SIACRE180*, *NbACRE75* and *NbACRE180* coding sequences  
282 were chemically synthesized by GenScript. For *SIACRE75*, *SIACRE180*, *NbACRE75* and  
283 *NbACRE180*, cDNAs from pUC57 entry vector were transformed by electroporation into  
284 *Escherichia coli* strain DH10B and transferred by a recombinant LR reaction of Gateway  
285 cloning (Clonase II enzyme mix Kit, Thermo Fisher) into pB7WGF2 (Karimi et al., 2002).

286

### 287 **Transient expression in *Nicotiana benthamiana***

288 *Agrobacterium tumefaciens*, strain GV3103, carrying plasmids with expression constructs (i)  
289 pB7WGF2:35S:GFP:SIACRE75; (ii) pB7WGF2:35S:GFP:SIACRE180; (iii)  
290 pB7WGF2:35S:GFP:NbACRE180; (iv) pB7WGF2:35S:GFP:NbACRE75 and; (v)  
291 pB7WGF2:35S:GFP (empty vector), were grown in YEP medium (containing 50 µg/ ml  
292 rifampicin, 100 µg/ ml spectinomycin, and 25 µg/ ml gentamicin) for 24 h with continuous  
293 shaking at 28°C. Overnight cultures were collected by centrifugation, resuspended in  
294 Agromix/infiltration buffer (10 mM MgCl<sub>2</sub> : 10 mM MES) and 200 µM acetosyringone (pH  
295 5.7) and diluted to a final volume of 20 ml at OD<sub>600</sub> of 0.1. Cultures were infiltrated into

296 leaves of 4-week-old *N. benthamiana* plants using 1 ml needleless syringes. One day after  
297 agroinfiltration, 1-2 leaves per plant were excised for *B. cinerea* infection assays (as  
298 described above). These experiments were repeated once.

299

300

### 301 **Confocal microscopy analysis**

302 For the analysis of the subcellular localization, *A. tumefaciens* GV3101 carrying plasmids  
303 with expression constructs were co-infiltrated with pFlub vector (RFP-peroxisome tagged  
304 marker) into leaves of 4-week-old *N. benthamiana* CB157 (nucleus mRFP marker) and  
305 CB172 (ER mRFP marker) reporter lines using 1 ml needleless syringes. Two days after  
306 infiltration, leaves were excised and prepared for confocal microscopy. GFP and mRFP  
307 fluorescence was examined under Nikon A1R confocal microscope with a water-dipping  
308 objective, Nikon X 40/ 1.0W. GFP was excited at 488 nm from an argon laser and its  
309 emissions were detected between 500 and 530 nm. mRFP was excited at 561 nm from a  
310 diode laser, and its emissions were collected between 600 and 630 nm.

### 311 **Western blot analysis**

312 Leaves from *N. benthamiana* leaves infiltrated with *A. tumefaciens* GV3101 carrying  
313 plasmids with expression constructs were excised, ground and proteins extracted as  
314 previously described (Gilroy et al., 2011, Yang et al., 2016). Western blotting was performed  
315 as previously described (Qin et al., 2018). Detection of GFP was performed using a  
316 polyclonal rabbit anti-GFP antibody (1:4,000 dilution) and secondary anti-mouse antibody  
317 (IG HRP 1:10,000) according to the manufacturer's instructions. ECL development kit  
318 (Amersham) detection was used according to the manufacturer's instructions.

### 319 **Transformation of *Arabidopsis thaliana* stable overexpression transgenic lines**

320 Arabidopsis overexpression plants were transformed using *A. tumefaciens* GV3101 carrying  
321 plasmids with expression constructs using the flower dipping method (Clough and Bent,  
322 1998). Selection of Arabidopsis transformants and homozygous lines selection were  
323 performed as described (Luna et al., 2014). Resistance was tested against *B. cinerea* as  
324 described before. Two independent homozygous overexpression lines were obtained per  
325 construct.

### 326 **Pathosystem statistics**

327 Statistical analysis of induced resistance and growth phenotypes were performed as described  
328 (Luna et al., 2016). Data analysis was performed using SPSS Statistics 23 and GenStat® 18th  
329 Edition (VSN International, Hemel Hempstead, UK). Statistical analysis of resistance  
330 phenotypes in Arabidopsis overexpression lines was done by ANOVA with ‘construct’ as a  
331 single treatment factor at 10 levels: Col-0 (wild-type treatment); two empty vector lines ‘EV  
332 3.1’ and ‘EV 4.1’; ‘SIACRE75 1.1’ and ‘SIACRE75 2.1’; ‘SIACRE180 1.2’ and  
333 ‘SIACRE180 3.1’; ‘NbACRE180 1.1’ and ‘NbACRE180 2.1’; and ‘NbACRE75 1.1’. The  
334 replicate units were individual plants of which there were 8-16 for each construct.  
335 Measurements of four lesions were recorded for each plant. Random effects were modelled as  
336 plant + plant × lesion to capture the plant-to-plant and within-plant variation. As part of the  
337 ANOVA, specific planned (non-orthogonal) contrasts were included to test for significant  
338 differences between the mean for each construct line compared to Col-0.

339

## 340 **Results**

341

342 **Identification and characterisation of a novel chitosan formulation in its ability to**  
343 **induce resistance against *Botrytis cinerea***

344 We tested the water-soluble chitosan-based commercial formulation ChitoPlant, from  
345 hereafter termed chitosan, in its capacity to induce resistance against the fungal pathogen *B.*  
346 *cinerea*. Treatments of chitosan demonstrated that this elicitor successfully triggers resistance  
347 in tomato (Figure 1a), Arabidopsis (Figure 1b) and aubergine (Fig S1) against *B. cinerea*. In  
348 tomato, chitosan significantly decreased necrotic lesion size in all concentrations compared  
349 with control plants (Fig 1a). The resistance phenotype induced by chitosan had a dose-  
350 dependent effect at the two high concentrations (1% and 0.1%), however, the lowest  
351 concentration (0.01%) induced a level of resistance in between 0.1% and 1% treatments. In  
352 Arabidopsis, chitosan treatment resulted in induced resistance in a concentration-dependent  
353 manner, with 1% having the strongest effect (Fig 1b). In aubergine, chitosan treatment  
354 resulted in differences in lesion diameter in all concentrations compared to water-treated  
355 control plants (Figure S1), however, post-hoc analysis demonstrated that 0.1% was the most  
356 effective concentration.

357

358 We then tested whether chitosan induces callose deposition in a similar manner to other  
359 chitosan formulations (Luna et al., 2011). Plants were treated with increasing concentrations  
360 of chitosan one day before aniline blue staining. In both plant species, treatments with  
361 chitosan resulted in a direct induction of callose. The lowest concentrations of 0.001% and  
362 0.01% in tomato and Arabidopsis, respectively, triggered the strongest effect (Fig 1 c and d).

363

364 To determine any antifungal effect of chitosan, different concentrations were tested on *B.*  
365 *cinerea* hyphal growth *in vitro* and compared to different concentrations of the fungicide  
366 Switch (Syngenta). Whereas all concentrations of Switch arrested pathogen growth, only  
367 0.1% concentration of chitosan or higher had an antifungal effect (Fig S2). However, the  
368 lowest concentration of chitosan tested (0.01 %) had no antifungal effect compared to the

369 control. This shows a concentration threshold for chitosan-direct antifungal activity against *B.*  
370 *cinerea*. Since 0.01% chitosan had no antifungal effect, but reduced *B. cinerea* lesions and  
371 induced callose formation, this concentration was selected for more in-depth analysis.

372

### 373 **Analysis of priming mechanisms marking chitosan-induced resistance**

374 We tested whether induced resistance triggered by chitosan is mediated by priming  
375 mechanisms through the assessment of its capacity to induced long-lasting resistance in distal  
376 parts of the plants. Treatments with 1% chitosan induced long-lasting resistance against *B.*  
377 *cinerea* of up to 2 weeks after initial treatment of tomato plants (Fig 2a).

378

379 In order to assess whether treatments with chitosan directly affects plant development, we  
380 tested plant growth one week after treatment with 1% chitosan. These experiments revealed  
381 that chitosan treatment triggers a statistically significant growth promotion, therefore  
382 indicating that induced resistance by chitosan does not negatively impact plant development  
383 (Fig S3a).

384

385 To study whether chitosan induced resistance (IR) was based on known mechanisms of  
386 priming, callose and hormone profiling analysis were performed after subsequent infection.  
387 Treatment with chitosan resulted in the accumulation of approximately twice the callose  
388 deposited at the site of attack compared to plants treated with water (Fig 2b,c). In addition,  
389 mass spectrometry profiling of defence-dependent hormones demonstrated that chitosan-  
390 induced resistance is mediated specifically by accumulation of jasmonic acid (JA) (Fig 2c)  
391 and its amino acid conjugate JA- isoleucine (JA-Ile, Fig S3b). In contrast, no other impacts  
392 were found in the concentration of other defence hormones such as salicylic acid (SA) and



393 abscisic acid (ABA) (Fig 2c). Thus, chitosan-IR is based on priming of callose at the  
394 infection site and accumulation of JA and its conjugate JA-Ile.

395

### 396 **Transcriptional analysis of chitosan-induced resistance**

397 Priming of gene expression normally follows a characteristic pattern: differential expression  
398 is low, transient or often non-detectable after treatment with the elicitor only (i.e. Chitosan +  
399 Mock) and enhanced differential expression occurs upon subsequent infection (i.e. Chitosan  
400 + *B. cinerea*) compared to infected plants that were not pretreated with the chemical (i.e.  
401 Water + *B. cinerea*) (Conrath et al., 2006, Martinez-Medina et al., 2016). Importantly, the  
402 expression kinetics are also key points for the establishment of priming. To further determine  
403 the priming basis of chitosan-induced resistance, we performed whole transcriptomic analysis  
404 at 6, 9 and 12 hours post infection (hpi) with *B. cinerea*. These time points were selected as  
405 they cover the early, non-symptomatic start of the *B. cinerea* infection process. Unsupervised  
406 data analysis was first performed to observe global changes in the experiment. For this, we  
407 did a 2D principal component analysis (PCA) at different hours post infection. This analysis  
408 shows that chitosan treatments did not trigger major changes in transcription, however, it was  
409 the infection with *B. cinerea* which greatly impacts the experiment (Fig 3a). Moreover,  
410 whereas separation can be observed between Mock- and *B. cinerea*-infected replicates at 9  
411 and 12 hpi, no obvious differences could be seen at the early time point of 6 hpi.

412

413 Genes with similar expression profiles were grouped, resulting in the identification of 1,722  
414 differentially-expressed genes (DEGs) across all three treatments and time points.  
415 Hierarchical clustering separated the genes into four crude groups when compared to the  
416 Water + Mock treatment at the first time point (6 hpi, Fig 3b): Cluster *i* consists of genes that  
417 were repressed by *B. cinerea* infection; cluster *ii* represents genes induced by chitosan

418 treatment only; cluster *iii* includes genes repressed by *B. cinerea* infection and by treatment  
419 of chitosan at the later time points; cluster *iv* consists of genes induced by *B. cinerea*  
420 infection and by treatment of chitosan only (Fig 3b). Overall patterns aligned with the  
421 previous finding that infection with *B. cinerea* had a large-scale, more extensive and  
422 differential response on tomato transcription compared to treatment with chitosan (Fig 3a).  
423 Moreover, the analysis demonstrates that application of chitosan results in a higher number of  
424 genes repressed than induced, with the exception of some highly induced genes in cluster *iv*.  
425 Distinct differences were evident between treatment with chitosan compared to infection with  
426 *B. cinerea*, e.g. a large group of genes in cluster *iv* differentially induced by *B. cinerea* at 9  
427 and 12 h, as well as a large group of genes repressed by the pathogen in cluster *i*. This  
428 indicates that chitosan works as a priming agent that does not directly trigger major effects in  
429 gene transcription.

430

431 To study the different signalling pathways and specific genes responsible for priming of  
432 chitosan against *B. cinerea*, a two-way ANOVA identified 8,471 differentially expressed  
433 genes (DEGs) among all three treatments and time points. This global list of DEGs was  
434 subsequently used for focussed pairwise analysis to identify transcripts changing between  
435 treatments at each time-point. Venn diagrams demonstrates that the effect of chitosan on its  
436 own did not trigger major changes in gene transcription: only 15, 36 and 20 genes were  
437 differentially expressed in Chitosan + Mock vs Water + Mock treatments at 6, 9 and 12 hpi,  
438 respectively (Fig 3c). However, the effect of chitosan was much more pronounced after  
439 plants had been infected with *B. cinerea*. This combination resulted in the differential  
440 expression of 543, 2,011 and 2,967 genes at 6, 9 and 12 hpi, respectively, of which 260, 991  
441 and 723 DEGs were induced only in the chitosan *B. cinerea* treatment (Fig 3c). In  
442 comparison, Water + *B. cinerea* treatments displayed differential expression of 327, 1,134,

443 and 2,697 genes at 6, 9 and 12 hpi, respectively, of which 70, 116 and 501 DEGs were  
444 specific to the Water + *B. cinerea* treatment (Fig 3c). These results demonstrate that there is a  
445 subset of genes potentially responsible for chitosan-induced priming for a faster and more  
446 robust response against *B. cinerea*.

447

448 To further identify early-acting signalling pathways and genes involved in chitosan-induced  
449 priming, further analyses were performed on genes corresponding to the 260 probes  
450 differentially expressed only in the Chitosan + *B. cinerea* treatment at 6 hpi. Gene  
451 overrepresentation analysis was performed to identify biological processes and molecular  
452 functions of enriched genes. For biological processes, pathways such as response to stimulus,  
453 chemical and auxins were overrepresented (Table 1). Moreover, for molecular function,  
454 cysteine-type peptidase activity, transcription factor activity, sequence-specific DNA binding  
455 and nucleic acid binding transcription factor activity were enriched (Table 1).

456

#### 457 **Identification of genes primed by chitosan**

458 To identify genes that could be involved in chitosan-induced resistance, gene expression  
459 profiles were scrutinized. First, qRT-PCR analysis of a subset of 9 genes was done to  
460 successfully validate the expression data of the microarray (Fig S4). Similar expression  
461 profiles were observed in the microarray and the qRT-PCR data, validating the data set.  
462 Priming profiles, i.e. subtle or non-detectable differential expression after chitosan treatment  
463 (i.e. Chitosan + Mock) and an increased differential expression after infection (i.e. Chitosan +  
464 *B. cinerea*) were identified. Transcripts of the earliest time point during the infection (6 hpi)  
465 were chosen to identify primed genes involved in early immune responses. Expression of the  
466 subset of 260 DEGs unique for Chitosan + *B. cinerea* treatment at 6 hpi (Fig 3c) were  
467 analysed over Water + Mock, Chitosan + Mock and water + *B. cinerea*. From the subset, 203

468 down-regulated (Table S1) and 57 genes were found to be up-regulated (Table S2). An over-  
469 representation test was performed to investigate gene ontology categories of the primed genes  
470 (Panther 14.0).

471

472 Among the 203 genes that were repressed during infection (Table S1), eleven transcripts were  
473 associated with cysteine-type peptidase activity. Other transcripts were grouped with  
474 photosynthesis, light harvesting in photosystem I activity. Moreover, several had a response  
475 to hormone activity; nine ethylene-responsive transcription factor and receptor genes were  
476 significantly down-regulated from -2,3 to -1,1 compared to Water + *B. cinerea*. Other notable  
477 genes with strong priming include those with proteolysis activity, with a range between -3 to  
478 -1,7 fold repressed. Other genes with repressed expression belong to auxin hormones and one  
479 to the ABA receptor (ABAPYL4). Furthermore, two genes of the little-known LATERAL  
480 ORGAN BOUNDARIES (LOB) were identified as repressed. Additional transcripts were  
481 functionally unassigned within the list.

482

483 Among the 57 differentially up-regulated genes (Table S2), there was one transcript encoding  
484 peroxidase activity with 2 fold increase compared to Water + *B. cinerea*, nine transcripts with  
485 protein kinase activity with between +1,1 to +2,1 fold, five transcripts with transcription  
486 regulatory activity, including SIMYB20, SLWRKY51 and SIWRKY72. Additional  
487 transcripts were functionally unassigned within the list.

488

489 Importantly, uncharacterised genes also show primed expression patterns. Of these, Avr9/Cf-  
490 9 rapidly elicited protein 75 (ACRE75; Solyc11g010250.1) was up-regulated 1,6-fold in  
491 Chitosan + *B. cinerea* in comparison to water + *B. cinerea* at 6 hpi (Table S2). ACRE genes  
492 have been previously studied and characterised as important genes involved in R gene-

493 mediated and ROS gene-independent early plant defence responses (Durrant et al., 2000) and  
494 in response to methyl-jasmonate (MeJA) treatment (van den Burg et al., 2008). *ACRE75*  
495 molecular functions are still to be deciphered and therefore research into its role and other  
496 members of the ACRE gene family in priming of chitosan was pursued.

497

#### 498 **Role of ACRE genes in induced resistance against *Botrytis cinerea***

499 In order to investigate whether other members of the ACRE gene family display a similar  
500 priming profile to *ACRE75*, correlation analysis was performed on the subset of genes  
501 differentially expressed at 6 hpi. Genes with statistically significant similar profiles were  
502 identified (Table S3), which included *ACRE180* at a confidence value of 0.956. In addition,  
503 analysis of the samples later in the experiment, confirmed that both *ACRE75* and *ACRE180*  
504 are primed also at later time points (Fig S4).

505

506 In order to investigate whether primed expression of *ACRE75* and *ACRE180* genes may be  
507 involved in enhanced disease resistance, genes from *S. lycopersium* and ortholog genes in *N.*  
508 *benthamiana* were overexpressed using both transient and stable systems. For *SIACRE75*,  
509 best match against *N. benthamiana* genome was Niben101Scf03108g12002.1 (termed  
510 *NbACRE75*), sharing a 77.5% protein identity; (ii) For *SIACRE180*, the best match against the  
511 *N. benthamiana* genome was Niben101Scf12017g01005.1 (termed *NbACRE180*), with  
512 49.5% protein identity. Arabidopsis ortholog analysis failed to identify hits for *ACRE75* and  
513 *ACRE1280* candidate genes. Constructs were produced with a fused GFP protein in the N-  
514 terminus and protein integrity was confirmed via Western blot. Proteins extracted from *N.*  
515 *benthamiana* leaves 48h after agro-infiltration and Western blot analysis confirmed that they  
516 were the expected sizes (Fig S5). Subcellular location of proteins was analysed via confocal  
517 microscopy of GFP fluorescence (Fig S6). Overexpression constructs were co-infiltrated with

518 RFP-marker pFlub vector (McLellan et al., 2013) (Fig S6a) into *N. benthamiana* reporter  
519 lines CB157 (nucleus mRFP marker - Fig S6b) and CB172 (ER mRFP marker - Fig S6c).  
520 Free GFP accumulated in both cytoplasm and nucleus (Fig S6d), whereas GFP-SIACRE75  
521 and GFP-NbACRE75 fusions accumulated exclusively in the nucleus and nucleolus of *N.*  
522 *benthamiana* cells (Fig S6e,f). Furthermore, GFP-SIACRE180 fusion accumulated  
523 exclusively in ER (Fig S6g), whereas GFP-NbACRE180 fusion accumulation was  
524 exclusively in peroxisomes (Fig S6h).

525

526 To further investigate the impact of overexpression of *ACRE* genes in disease resistance, the  
527 4 constructs containing GFP-SIACRE75, GFP-SIACRE180, GFP-NbACRE75 and GFP-  
528 NbACRE180, and GFP-empty vector (EV), were agro-infiltrated into leaves of *N.*  
529 *benthamiana* plants, which were subsequently challenged with *B. cinerea*. Chitosan-induced  
530 resistance against *B. cinerea* was proven effective in *N. benthamiana* (Fig 4a). All GFP-  
531 SIACRE75, GFP-SIACRE180, GFP-NbACRE75 and GFP-NbACRE180-infiltrated *N.*  
532 *benthamiana* leaves showed a significant decreased in *B. cinerea* necrotic lesion size  
533 compared with the EV control (Fig 4b). To further analyse *ACRE75* and *ACRE180* biological  
534 functions and to confirm their role in plant resistance against *B. cinerea*, Arabidopsis plants  
535 were transformed to constitutively overexpress GFP-SIACRE75, GFP-SIACRE180, GFP-  
536 NbACRE75 and GFP-NbACRE180 proteins. Homozygous lines were identified and growth  
537 phenotype of transgenic plants was analysed by measuring rosette perimeter. No statistically  
538 significant differences were identified (Fig S7). Five-week-old plants were infected with *B.*  
539 *cinerea* and disease was scored at 6 dpi. Transgenic GFP-SIACRE75, GFP-SIACRE180,  
540 GFP-NbACRE180 and GFP-NbACRE75 overexpression plants all showed an enhanced  
541 resistance phenotype and significantly decreased *B. cinerea* lesion sizes in comparison to  
542 Col-0 and GFP-EV controls (Fig 4c). Furthermore, GFP-SIACRE75 and its homolog GFP-

543 NbACRE75-overexpression plants showed a stronger resistance to *B. cinerea* than GFP-  
544 SIACRE180 and GFP-NbACRE180 overexpression lines at 6 dpi (Fig 4c).

545

## 546 **Discussion**

547 We have assessed the capacity of chitosan to induce resistance against *B. cinerea* in different  
548 plant species and have linked its effect with priming of defence mechanisms. We have  
549 identified a formulation of chitosan that unlike some other formulations, can be easily  
550 dissolved in water and does not require infiltration. This opens possibilities to identify early-  
551 acting priming mechanisms in elicitor-induced resistance. Moreover, it enables opportunities  
552 for upscaling the use of chitosan as an elicitor of resistance in large-scale experiments due to  
553 the high-throughput nature of spraying the elicitor onto plants.

554 Treatments with chitosan resulted in induced resistance in *S. lycopersicum* (Fig 1a), *S.*  
555 *melongena* (Fig S1), Arabidopsis (Fig 1b) and *N. benthamiana* (Fig 4a) at a range of  
556 concentrations, which indicates that there are similar defence mechanisms acting in the  
557 response to fungal PAMPs. Moreover, treatments with chitosan resulted in the activation of  
558 basal resistance processes such as the deposition of callose at the cell wall (Fig 1c and d),  
559 which is considered an important factor for penetration resistance against invading pathogens  
560 (Oide et al., 2013). Expression of resistance was dependent on the concentration of chitosan  
561 used in Arabidopsis. In contrast, in tomato and aubergine the levels of resistance did not  
562 depend on the chitosan concentration. Moreover, chitosan-induced callose deposition in  
563 tomato and Arabidopsis did not follow a classical dose-response curve and the most effective  
564 treatments that activated callose were the lower concentrations of the elicitor (Fig 1c and d).  
565 This is likely to be dependent on the antimicrobial effects of chitosan (Fig S2) at higher  
566 concentrations. Other elicitors have been shown to trigger induced resistance phenomena at  
567 lower concentrations. For example, meJA treatment results in more effective protection

568 against the pathogen *Fusarium oxysporum* f.sp. *lycopersici* when applied at lower  
569 concentrations (Król et al., 2015). In contrast, high doses of MeJA had detrimental effects on  
570 physiological processes and overall decreased protection efficiency. This, together with the  
571 observation that low concentrations of chitosan do not directly impact pathogen growth (Fig  
572 S2) suggests that there is a concentration threshold in the effect of chitosan-induced  
573 resistance.

574

575 Foliar applications of chitosan have been widely used to control disease development caused  
576 by numerous pests and pathogens (El Hadrami et al. 2010). However, few studies have  
577 investigated the role of chitosan as a priming agent and most have focused on its use as a seed  
578 priming elicitor mainly to improve germination and yield (Guan et al., 2009, Hameed et al.,  
579 2013). Here, we show that chitosan-induced resistance is based on priming of defence  
580 mechanisms. Our experiments confirmed that chitosan-induced resistance is not associated  
581 with growth reduction (Fig S3a), was durable and maintained for at least two weeks after  
582 treatment (Fig 2a), and that is based on a stronger accumulation of callose at the site of  
583 attack and accumulation of JA (Fig 2d) and JA-ile (Fig S3b). These results demonstrate that  
584 fungal growth arrest after chitosan treatment is not directly mediated by the toxicity effect of  
585 the chemical, as the infected leaves were formed after treatment and therefore were not  
586 sprayed with the elicitor. Moreover, these results demonstrate similar priming mechanisms  
587 after chitosan treatment to other elicitors, including Hx, which has been linked with priming  
588 of callose and JA against *B. cinerea* (Fernández-Crespo et al., 2017, Wang et al., 2014).  
589 Interestingly, however, despite many reported antagonistic and other crosstalk interactions  
590 between plant hormones (Robert-Seilaniantz et al., 2011), the concentrations of other plant  
591 hormones, SA and ABA, were not affected. This suggests that priming by chitosan does not



592 result in the downregulation of other hormone-dependent signalling pathways, thereby  
593 maintaining an effective resistance status against other stresses.

594

595 In order to further explore priming of defence and to unravel the transcriptional mechanisms  
596 behind chitosan-induced resistance, we performed transcriptome analysis. In our experiment,  
597 using a concentration of chitosan that is associated with priming but with no direct  
598 antimicrobial effect, we identified early-acting differential transcriptomic changes. Results  
599 demonstrate that chitosan treatments do not result in major transcriptional changes (Fig 3a).  
600 In contrast, comparison of treatment against Water + Mock revealed and Chitosan + *B.*  
601 *cinerea* shows a higher number of DEGs (Fig 3b and c), thus responding to the priming  
602 nature of the elicitor in the first instance.

603 Panther enrichment analysis showed that at 6hpi, the number of down-regulated DEGS was  
604 more than three times up-regulated ones for Chitosan + *B. cinerea* (203 down-regulated and  
605 57 DEGs up-regulated). This suggests that tomato plants might repress susceptible factors in  
606 order to reduce *B. cinerea* manipulation of host defences (El Oirdi et al., 2011, Temme and  
607 Tudzynski, 2009). Interestingly, some of the down-regulated transcripts have cysteine-type  
608 peptidase activity (Table S1). These proteins have been reported to have a role in immunity  
609 against pathogens including *B.cinerea* (Pogány et al., 2015). Other down-regulated genes are  
610 related to plant hormone activity; including ethylene AP2/ERF transcription factors and ABA  
611 PYL receptors (SIABAPYL4), reported to be involved in defence responses, which act as  
612 positive or negative regulators of JA/ET-dependent defences against *B. cinerea* (Cantu et al.,  
613 2009, Moffat et al., 2012). Up-regulated genes included transcripts with peroxidase and  
614 transcription regulatory activity, such as peroxidase 5, SIMYB20, SLWRKY51 and  
615 SIWRKY72, CONSTANS-like protein with zinc finger binding domain and NAC domain  
616 protein and a RING-type E3 ubiquitin transferase involved in protein degradation. These

617 genes have been linked with defence responses (Serrano et al., 2018), which could be result  
618 in priming of the tomato immune system against *B. cinerea* infection.

619

620 Transcriptomic (Table S2, Fig S4) and qRT-PCR (Fig S4) analyses showed that chitosan can  
621 prime *ACRE75* for a faster and stronger expression after infection with *B. cinerea*. *ACRE*  
622 genes have been linked to plant defence responses. Similar genes were previously identified  
623 in tobacco cells to exhibit rapid Cf-9–dependent change in expression through gene-for-gene  
624 interaction between the biotroph pathogen *Cladosporium fulvum* avirulence gene (*Avr9*) and  
625 tomato resistance Cf-9 gene (Durrant et al., 2000). To determine the role of *ACRE* genes in  
626 priming by chitosan, we searched for other *ACRE* genes showing similar expression profiles  
627 to *ACRE75* and this revealed that *ACRE180* displays a similar priming profile. This was more  
628 evident at 9 hpi (Fig S4) than at 6 hpi, suggesting that the role of *ACRE180* is later time than  
629 *ACRE75*. Subcellular localisation may indicate why priming of these genes does not occur at  
630 the same time; whereas *ACRE75* accumulates exclusively in the nucleus and nucleolus  
631 (Figure S6e and f), *ACRE180* accrues in the ER and peroxisomes (Figure S6g and h). This  
632 suggests different molecular functions of these proteins as they tag different cell organelles.  
633 Moreover, it could be plausible that *ACRE75* and *ACRE180* are part of the same signalling  
634 pathway, one working upstream of the other, therefore justifying the delayed transcription  
635 and activity of *ACRE180*.

636

637 The roles of *ACRE75* and *ACRE180* in chitosan-induced priming were investigated by  
638 overexpressing these genes in transient and stable systems, in *N. benthamiana* and  
639 *Arabidopsis*, respectively. Moreover, we aimed to identify any *N. benthamiana* and  
640 *Arabidopsis* *ACRE75* and *ACRE180* analogues. BLAST analysis of tomato *ACRE75*  
641 identified a very low amino acid identity sequence (39%) and *ACRE180* failed to identify

642 any Arabidopsis homologue. In contrast, *N. benthamiana* ACRE75 and ACRE180  
643 homologues were putatively identified. ACRE75 and ACRE180 lack signal peptides, which  
644 suggests they might encode small proteins involved in signalling or antimicrobial activity  
645 within the infected cell. Similar to the exclusive production of glucosinolates compounds in  
646 Brassica plants (Matthaus & Luftmann 2000) it is likely that ACRE75 and ACRE180 are  
647 involved in the production of unique compounds to Solanaceae plants. Overexpression of  
648 *SIACRE75* and *SIACRE180*, and their *N. benthamiana* orthologues results in induced  
649 resistance against *B. cinerea* (Fig 4b and c). Therefore, our results confirm involvement of  
650 ACRE genes in plant immunity and suggest an involvement in chitosan-induced priming due  
651 to their expression profiles. Interestingly, the induced resistance effect was greater in  
652 Arabidopsis plants overexpressing ACRE75 in comparison to ACRE180 (Fig 4c), which  
653 could corroborate our evidence of earlier activity of ACRE75, therefore being more effective  
654 during early resistance response. More work is needed to unravel the molecular function of  
655 ACRE75 and ACRE180 in the expression of priming mechanisms. Nevertheless, fine-tuning  
656 of priming-based mechanisms under the control of *SIACRE75*, *SIACRE180*, *NbACRE75* and  
657 *NbACRE180* could facilitate its incorporation into other crop species for the enhancement of  
658 cross tolerance to old and emergent pest and pathogens, and other challenges. The results  
659 unveiled potential molecular pathways involved in chitosan-induced priming of resistance in  
660 tomato against *B. cinerea*, potentially applicable to other crops.

661

## 662 **Acknowledgement**

663

664 The authors thank Prof Nicola Stanley-Wall for the academic supervision, Prof Murray Grant for his  
665 assistance during HPLC analysis of plant defence hormones, Prof Jurriaan Ton for initial advice on  
666 the project, laboratory access, resources, support and intellectual input, Dr Katherine Wright for her

667 support during the confocal microscopy analysis, Dr Colin Alexander for his help with the statistics  
668 described in the paper and Dr Mike Roberts for providing spores of *B. cinerea* and extremely valuable  
669 input with the microarray analysis. We thank ChiPro GmbH for providing the commercial  
670 formulation of chitosan. We are grateful for financial support from the Rural and Environmental  
671 Science and Analytical Services (RESAS) Division of the Scottish Government (2011-16) under its  
672 Environmental Change and Food, Land and People Research Programmes. This work is funded by  
673 AHDB (HDC) Studentship CP105 was secured by A.N and N.H to support D.DV doctoral  
674 programme, and the BBSRC Future Leader Fellowship BB/P00556X/1 and BB/P00556X/2 to E.L.

675

## 676 **Author contribution**

677 All bioassays were performed by D.DV and E.L. Transcriptome analysis was done by J.M and P.E.H  
678 Data analysis was performed by D.DV, N.H, P.E.H and E.L. Intellectual input was provided by  
679 D.DV, N.H, P.E.H, E.L and A.N. Project was conceived and supervised by N.H and A.N. The  
680 manuscript was written by D.DV and E.L with input from all authors.

681

## 682 **References**

- 683 ARANEGA-BOU, P., DE LA O LEYVA, M., FINITI, I., GARCÍA-AGUSTÍN, P. & GONZÁLEZ-BOSCH, C. 2014.  
684 Priming of plant resistance by natural compounds. Hexanoic acid as a model. *Frontiers in*  
685 *Plant Science*, 5.
- 686 CANTU, D., BLANCO-ULATE, B., YANG, L., LABAVITCH, J. M., BENNETT, A. B. & POWELL, A. L. T. 2009.  
687 Ripening-Regulated Susceptibility of Tomato Fruit to *Botrytis cinerea* Requires  
688 *NOR* But Not *RIN* or Ethylene. *Plant Physiology*, 150, 1434-1449.
- 689 CLOUGH, S. J. & BENT, A. F. 1998. Floral dip: a simplified method for Agrobacterium-mediated  
690 transformation of *Arabidopsis thaliana*. *The Plant Journal*, 16, 735-743.
- 691 CONRATH, U., BECKERS, G. J. M., FLORS, V., GARCÍA-AGUSTÍN, P., JAKAB, G., MAUCH, F., NEWMAN,  
692 M.-A., PIETERSE, C. M. J., POINSSOT, B., POZO, M. J., PUGIN, A., SCHAFFRATH, U., TON, J.,  
693 WENDEHENNE, D., ZIMMERLI, L. & MAUCH-MANI, B. 2006. Priming: Getting Ready for  
694 Battle. *Molecular Plant-Microbe Interactions*, 19, 1062-1071.
- 695 DURRANT, W. E., ROWLAND, O., PIEDRAS, P., HAMMOND-KOSACK, K. E. & JONES, J. D. G. 2000.  
696 cDNA-AFLP Reveals a Striking Overlap in Race-Specific Resistance and Wound Response  
697 Gene Expression Profiles. *The Plant Cell*, 12, 963-977.
- 698 EL OIRDI, M., EL RAHMAN, T. A., RIGANO, L., EL HADRAMI, A., RODRIGUEZ, M. C., DAAYF, F.,  
699 VOJNOV, A. & BOUARAB, K. 2011. *Botrytis cinerea* manipulates the antagonistic effects  
700 between immune pathways to promote disease development in tomato. *The Plant cell*, 23,  
701 2405-2421.

- 702 FARETRA, F. & POLLASTRO, S. 1991. Genetic basis of resistance to benzimidazole and dicarboximide  
703 fungicides in *Botryotinia fuckeliana* (*Botrytis cinerea*). *Mycological Research*, 95, 943-951.
- 704 FERNÁNDEZ-CRESPO, E., NAVARRO, J. A., SERRA-SORIANO, M., FINITI, I., GARCÍA-AGUSTÍN, P.,  
705 PALLÁS, V. & GONZÁLEZ-BOSCH, C. 2017. Hexanoic Acid Treatment Prevents Systemic MNSV  
706 Movement in Cucumis melo Plants by Priming Callose Deposition Correlating SA and OPDA  
707 Accumulation. *Frontiers in Plant Science*, 8.
- 708 FINITI, I., DE LA O. LEYVA, M., VICEDO, B., GÓMEZ-PASTOR, R., LÓPEZ-CRUZ, J., GARCÍA-AGUSTÍN, P.,  
709 REAL, M. D. & GONZÁLEZ-BOSCH, C. 2014. Hexanoic acid protects tomato plants against  
710 *Botrytis cinerea* by priming defence responses and reducing oxidative stress. *Molecular Plant  
711 Pathology*, 15, 550-562.
- 712 FORCAT, S., BENNETT, M. H., MANSFIELD, J. W. & GRANT, M. R. 2008. A rapid and robust method for  
713 simultaneously measuring changes in the phytohormones ABA, JA and SA in plants following  
714 biotic and abiotic stress. *Plant Methods*, 4, 16.
- 715 GAMIR, J., PASTOR, V., KAEVER, A., CERZO, M. & FLORS, V. 2014. Targeting novel chemical and  
716 constitutive primed metabolites against *Plectosphaerella cucumerina*. *The Plant Journal*, 78,  
717 227-240.
- 718 GILROY, E. M., TAYLOR, R. M., HEIN, I., BOEVINK, P., SADANANDOM, A. & BIRCH, P. R. J. 2011.  
719 CMPG1-dependent cell death follows perception of diverse pathogen elicitors at the host  
720 plasma membrane and is suppressed by *Phytophthora infestans* RXLR effector AVR3a. *New  
721 Phytologist*, 190, 653-666.
- 722 GOY, R. C., BRITTO, D. D. & ASSIS, O. B. G. 2009. A review of the antimicrobial activity of chitosan.  
723 *Polímeros*, 19, 241-247.
- 724 GUAN, Y.-J., HU, J., WANG, X.-J. & SHAO, C.-X. 2009. Seed priming with chitosan improves maize  
725 germination and seedling growth in relation to physiological changes under low temperature  
726 stress. *Journal of Zhejiang University. Science. B*, 10, 427-433.
- 727 HAMEED, A., SHEIKH, M. A., FAROOQ, T., BASRA, S. & JAMIL, A. 2013. Chitosan priming enhances the  
728 seed germination, antioxidants, hydrolytic enzymes, soluble proteins and sugars in wheat  
729 seeds. *Agrochimica*, 57, 97-110.
- 730 KOHLER, A., SCHWINDLING, S. & CONRATH, U. 2002. Benzothiadiazole-Induced Priming for  
731 Potentiated Responses to Pathogen Infection, Wounding, and Infiltration of Water into  
732 Leaves Requires the *NPR1/NIM1* Gene in *Arabidopsis*. *Plant Physiology*, 128,  
733 1046-1056.
- 734 KRÓL, P., IGIELSKI, R., POLLMANN, S. & KĘPCZYŃSKA, E. 2015. Priming of seeds with methyl  
735 jasmonate induced resistance to hemi-biotroph *Fusarium oxysporum* f.sp. *lycopersici* in  
736 tomato via 12-oxo-phytodienoic acid, salicylic acid, and flavonol accumulation. *Journal of  
737 Plant Physiology*, 179, 122-132.
- 738 LA CAMERA, S., L'HARIDON, F., ASTIER, J., ZANDER, M., ABOU-MANSOUR, E., PAGE, G., THUROW, C.,  
739 WENDEHENNE, D., GATZ, C., MÉTRAUX, J.-P. & LAMOTTE, O. 2011. The glutaredoxin  
740 ATGRXS13 is required to facilitate *Botrytis cinerea* infection of *Arabidopsis thaliana* plants.  
741 *The Plant Journal*, 68, 507-519.
- 742 LUNA, E. 2016. Using Green Vaccination to Brighten the Agronomic Future. 27, 136-140(5).
- 743 LUNA, E., BEARDON, E., RAVNSKOV, S., SCHOLE, J. & TON, J. 2016. Optimizing Chemically Induced  
744 Resistance in Tomato Against *Botrytis cinerea*. *Plant Disease*, 100, 704-710.
- 745 LUNA, E., LÓPEZ, A., KOOIMAN, J. & TON, J. 2014. Role of NPR1 and KYP in long-lasting induced  
746 resistance by  $\beta$ -aminobutyric acid. *Frontiers in plant science*, 5, 184-184.
- 747 LUNA, E., PASTOR, V., ROBERT, J., FLORS, V., MAUCH-MANI, B. & TON, J. 2011. Callose Deposition: A  
748 Multifaceted Plant Defense Response. *Molecular Plant-Microbe Interactions*, 24, 183-193.
- 749 MARTINEZ-MEDINA, A., FLORS, V., HEIL, M., MAUCH-MANI, B., PIETERSE, C. M. J., POZO, M. J., TON,  
750 J., VAN DAM, N. M. & CONRATH, U. 2016. Recognizing Plant Defense Priming. *Trends in Plant  
751 Science*, 21, 818-822.

- 752 MAUCH-MANI, B., BACCELLI, I., LUNA, E. & FLORS, V. 2017. Defense Priming: An Adaptive Part of  
753 Induced Resistance. *Annual Review of Plant Biology*, 68, 485-512.
- 754 MCLELLAN, H., BOEVINK, P. C., ARMSTRONG, M. R., PRITCHARD, L., GOMEZ, S., MORALES, J.,  
755 WHISSON, S. C., BEYNON, J. L. & BIRCH, P. R. J. 2013. An RxLR Effector from *Phytophthora*  
756 *infestans* Prevents Re-localisation of Two Plant NAC Transcription Factors from the  
757 Endoplasmic Reticulum to the Nucleus. *PLOS Pathogens*, 9, e1003670.
- 758 MOFFAT, C. S., INGLE, R. A., WATHUGALA, D. L., SAUNDERS, N. J., KNIGHT, H. & KNIGHT, M. R. 2012.  
759 ERF5 and ERF6 Play Redundant Roles as Positive Regulators of JA/Et-Mediated Defense  
760 against *Botrytis cinerea* in *Arabidopsis*. *PLOS ONE*, 7, e35995.
- 761 MUÑOZ, Z. & MORET, A. 2010. Sensitivity of *Botrytis cinerea* to chitosan and acibenzolar-S-methyl.  
762 *Pest Management Science*, 66, 974-979.
- 763 OERKE, E. C. 2006. Crop losses to pests. *The Journal of Agricultural Science*, 144, 31-43.
- 764 OIDE, S., BEJAI, S., STAAL, J., GUAN, N., KALIFF, M. & DIXELIUS, C. 2013. A novel role of PR2 in abscisic  
765 acid (ABA) mediated, pathogen-induced callose deposition in *Arabidopsis thaliana*. *New*  
766 *Phytologist*, 200, 1187-1199.
- 767 PAPPAS, A. C. 1997. Evolution of fungicide resistance in *Botrytis cinerea* in protected crops in  
768 Greece. *Crop Protection*, 16, 257-263.
- 769 POGÁNY, M., DANKÓ, T., KÁMÁN-TÓTH, E., SCHWARCZINGER, I. & BOZSÓ, Z. 2015. Regulatory  
770 Proteolysis in *Arabidopsis*-Pathogen Interactions. *International journal of molecular sciences*,  
771 16, 23177-23194.
- 772 POZO, M. J., LÓPEZ-RÁEZ, J. A., AZCÓN-AGUILAR, C. & GARCÍA-GARRIDO, J. M. 2015. Phytohormones  
773 as integrators of environmental signals in the regulation of mycorrhizal symbioses. *New*  
774 *Phytologist*, 205, 1431-1436.
- 775 QIN, P., FAN, S., DENG, L., ZHONG, G., ZHANG, S., LI, M., CHEN, W., WANG, G., TU, B., WANG, Y.,  
776 CHEN, X., MA, B. & LI, S. 2018. LML1, Encoding a Conserved Eukaryotic Release Factor 1  
777 Protein, Regulates Cell Death and Pathogen Resistance by Forming a Conserved Complex  
778 with SPL33 in Rice. *Plant and Cell Physiology*, 59, 887-902.
- 779 RAAFAT, D. & SAHL, H.-G. 2009. Chitosan and its antimicrobial potential--a critical literature survey.  
780 *Microbial biotechnology*, 2, 186-201.
- 781 RAMÍREZ-CARRASCO, G., MARTÍNEZ-AGUILAR, K. & ALVAREZ-VENEGAS, R. 2017. Transgenerational  
782 Defense Priming for Crop Protection against Plant Pathogens: A Hypothesis. *Frontiers in*  
783 *Plant Science*, 8, 696.
- 784 REDMAN, A., CIPOLLINI, D. & SCHULTZ, J. 2001. Fitness costs of jasmonic acid-induced defense in  
785 tomato, *Lycopersicon esculentum*. *Oecologia*, 126, 380-385.
- 786 REECE-HOYES, J. S. & WALHOUT, A. J. M. 2018. Gateway Recombinational Cloning. *Cold Spring*  
787 *Harbor protocols*, 2018, pdb.top094912-pdb.top094912.
- 788 REJEB, I. B., PASTOR, V., GRAVEL, V. & MAUCH-MANI, B. 2018. Impact of  $\beta$ -aminobutyric acid on  
789 induced resistance in tomato plants exposed to a combination of abiotic and biotic stress.  
790 *Journal of Agricultural Science and Botany*, 2.
- 791 ROBERT-SEILANIANTZ, A., GRANT, M. & JONES, J. D. G. 2011. Hormone Crosstalk in Plant Disease and  
792 Defense: More Than Just JASMONATE-SALICYLATE Antagonism. *Annual Review of*  
793 *Phytopathology*, 49, 317-343.
- 794 ROMANAZZI, G., FELIZIANI, E., SANTINI, M. & LANDI, L. 2013. Effectiveness of postharvest treatment  
795 with chitosan and other resistance inducers in the control of storage decay of strawberry.  
796 *Postharvest Biology and Technology*, 75, 24-27.
- 797 SATHIYABAMA, M., AKILA, G. & EINSTEIN CHARLES, R. 2014. Chitosan-induced defence responses in  
798 tomato plants against early blight disease caused by *Alternaria solani* (Ellis and Martin)  
799 Sorauer. *Archives of Phytopathology and Plant Protection*, 47, 1777-1787.
- 800 SAVARY, S., FICKE, A., AUBERTOT, J. N. & HOLLIER, C. 2012. Crop losses due to diseases and their  
801 implications for global food production losses and food security. *Food Security*, 4, 519-537.

- 802 SCALSCHI, L., SANMARTÍN, M., CAMAÑES, G., TRONCHO, P., SÁNCHEZ-SERRANO, J. J., GARCÍA-  
803 AGUSTÍN, P. & VICEDO, B. 2015. Silencing of OPR3 in tomato reveals the role of OPDA in  
804 callose deposition during the activation of defense responses against *Botrytis cinerea*. *The*  
805 *Plant Journal*, 81, 304-315.
- 806 SERRANO, I., CAMPOS, L. & RIVAS, S. 2018. Roles of E3 Ubiquitin-Ligases in Nuclear Protein  
807 Homeostasis during Plant Stress Responses. *Frontiers in plant science*, 9, 139-139.
- 808 SLAUGHTER, A., DANIEL, X., FLORS, V., LUNA, E., HOHN, B. & MAUCH-MANI, B. 2012. Descendants of  
809 Primed Arabidopsis Plants Exhibit Resistance to Biotic Stress. *Plant Physiology*, 158, 835-843.
- 810 TEMME, N. & TUDZYNSKI, P. 2009. Does *Botrytis cinerea* Ignore H<sub>2</sub>O<sub>2</sub>-Induced Oxidative Stress  
811 During Infection? Characterization of Botrytis Activator Protein 1. *Molecular plant-microbe*  
812 *interactions : MPMI*, 22, 987-98.
- 813 THOMAS, P. D., CAMPBELL, M. J., KEJARIWAL, A., MI, H., KARLAK, B., DAVERMAN, R., DIEMER, K.,  
814 MURUGANUJAN, A. & NARECHANIA, A. 2003. PANTHER: A Library of Protein Families and  
815 Subfamilies Indexed by Function. *Genome Research*, 13, 2129-2141.
- 816 TON, J., JAKAB, G., TOQUIN, V., FLORS, V., IAVICOLI, A., MAEDER, M. N., MÉTRAUX, J.-P. & MAUCH-  
817 MANI, B. 2005. Dissecting the  $\beta$ -Aminobutyric Acid-Induced Priming Phenomenon in  
818 Arabidopsis. *The Plant Cell*, 17, 987-999.
- 819 VAN DEN BURG, H. A., TSITSIGIANNIS, D. I., ROWLAND, O., LO, J., RALLAPALLI, G., MACLEAN, D.,  
820 TAKKEN, F. L. W. & JONES, J. D. G. 2008. The F-box protein ACRE189/ACIF1 regulates cell  
821 death and defense responses activated during pathogen recognition in tobacco and tomato.  
822 *The Plant cell*, 20, 697-719.
- 823 VAN HULTEN, M., PELSER, M., VAN LOON, L. C., PIETERSE, C. M. J. & TON, J. 2006. Costs and benefits  
824 of priming for defense in *Arabidopsis*. *Proceedings of the National Academy of*  
825 *Sciences*, 103, 5602-5607.
- 826 VASSEUR, F., BRESSON, J., WANG, G., SCHWAB, R. & WEIGEL, D. 2018. Image-based methods for  
827 phenotyping growth dynamics and fitness components in *Arabidopsis thaliana*. *Plant*  
828 *Methods* [Online], 14. [Accessed 2018].
- 829 WANG, K., LIAO, Y., KAN, J., HAN, L. & ZHENG, Y. 2014. Response of direct or priming defense against  
830 *Botrytis cinerea* to methyl jasmonate treatment at different concentrations in grape berries.  
831 *International journal of food microbiology*, 194C, 32-39.
- 832 WARD, N. & MORENO-HAGELSIEB, G. 2014. Quickly Finding Orthologs as Reciprocal Best Hits with  
833 BLAT, LAST, and UBLAST: How Much Do We Miss? *PLOS ONE*, 9, e101850.
- 834 WILKINSON, S. W., PASTOR, V., PAPLAUSKAS, S., PÉTRACQ, P. & LUNA, E. 2018. Long-lasting  $\beta$ -  
835 aminobutyric acid-induced resistance protects tomato fruit against *Botrytis cinerea*. *Plant*  
836 *Pathology*, 67, 30-41.
- 837 WILLIAMSON, B., TUDZYNSKI, B., TUDZYNSKI, P. & VAN KAN, J. A. L. 2007. *Botrytis cinerea*: the cause  
838 of grey mould disease. *Molecular Plant Pathology*, 8, 561-580.
- 839 WORRALL, D., HOLROYD, G. H., MOORE, J. P., GLOWACZ, M., CROFT, P., TAYLOR, J. E., PAUL, N. D. &  
840 ROBERTS, M. R. 2012. Treating seeds with activators of plant defence generates long-lasting  
841 priming of resistance to pests and pathogens. *New Phytologist*, 193, 770-778.
- 842 YANG, L., MCLELLAN, H., NAQVI, S., HE, Q., BOEVINK, P. C., ARMSTRONG, M., GIULIANI, L. M.,  
843 ZHANG, W., TIAN, Z., ZHAN, J., GILROY, E. M. & BIRCH, P. R. J. 2016. Potato NPH3/RPT2-Like  
844 Protein StNRL1, Targeted by a *Phytophthora infestans* RXLR Effector, Is a  
845 Susceptibility Factor. *Plant Physiology*, 171, 645-657.
- 846 YOUNES, I., HAJJI, S., FRACHET, V., RINAUDO, M., JELLOULI, K. & NASRI, M. 2014. Chitin extraction  
847 from shrimp shell using enzymatic treatment. Antitumor, antioxidant and antimicrobial  
848 activities of chitosan. *International Journal of Biological Macromolecules*, 69, 489-498.
- 849 ZIMMERLI, L., JAKAB, G., MÉTRAUX, J.-P. & MAUCH-MANI, B. 2000. Potentiation of pathogen-specific  
850 defense mechanisms in *Arabidopsis* by  $\beta$ -aminobutyric acid. *Proceedings of the*  
851 *National Academy of Sciences*, 97, 12920-12925.

852

853

854

855

856

857

858

859

860

861

862

863

864

865

866 **Tables**

867 **Table 1: Biological processes and molecular functions of enriched genes**

| GO biological processes for Chitosan + B.cinerea at 6 hpi    |                        |          |          |                 |     |               |
|--------------------------------------------------------------|------------------------|----------|----------|-----------------|-----|---------------|
|                                                              | S. lycopersicum ref. # | Upload # | Expected | Fold Enrichment | +/- | P value <0.05 |
| response to auxin                                            | 209                    | 10       | 1.58     | 6.35            | +   | 9.47E-03      |
| response to chemical                                         | 916                    | 20       | 6.91     | 2.9             | +   | 4.55E-02      |
| response to stimulus                                         | 2657                   | 44       | 20.03    | 2.2             | +   | 1.25E-03      |
| Unclassified                                                 | 17617                  | 117      | 132.83   | 0.88            | -   | 0.00E+00      |
|                                                              |                        |          |          |                 |     |               |
| GO molecular functions for Chitosan + B.cinerea at 6 hpi     |                        |          |          |                 |     |               |
|                                                              | S. lycopersicum ref. # | Upload # | Expected | Fold Enrichment | +/- | P value <0.05 |
| cysteine-type peptidase activity                             | 271                    | 11       | 2.04     | 5.38            | +   | 1.23E-02      |
| transcription factor activity, sequence-specific DNA binding | 856                    | 19       | 6.45     | 2.94            | +   | 4.78E-02      |
| nucleic acid binding transcription factor activity           | 856                    | 19       | 6.45     | 2.94            | +   | 4.78E-02      |
| Unclassified                                                 | 16331                  | 109      | 123.14   | 0.89            | -   | 0.00E+00      |

868

869 *To include in page 19 line 449*

870

871

872

873



874

875

876

877

878

879

880

881

882

883

884

885

886

887

888 **Figure Legends**

889

890 **Figure 1. Characterisation of chitosan-induced resistance in tomato and Arabidopsis.**

891 (a) Disease lesions in tomato and (b) in Arabidopsis at 3 days post inoculation. Values  
892 represent means  $\pm$  SEM (n=4-10). (c) Callose deposition triggered by chitosan treatment in  
893 tomato and (d) in Arabidopsis 1 day post treatment. Values represent means  $\pm$  SEM (n=8-10)  
894 of % of callose per leaf area. Different letters indicate statistically significant differences  
895 among treatments (Least Significant Differences for graph a and Dunnett T3 Post-Hoc test  
896 for graphs b, c and d,  $\alpha=0.05$ ).

897

898 **Figure 2. Chitosan-induced resistance is based on priming. (a) Disease lesions in tomato**

899 at 3 days post inoculation (dpi) 2 weeks after treatment with water (Control) or 1% chitosan.

900 Values represent means  $\pm$  SEM (n=8). Asterisk indicates statistically significant differences  
901 among treatments (Student's T. test,  $\alpha=0.05$ ). **(b)** Percentage of callose deposited at the  
902 infection site in water (Control) and chitosan (0.01%)-treated plants compared to the fungal  
903 lesion diameter at 1 day after infection with *B. cinerea*. Values represent means  $\pm$  SEM  
904 (n=4). Asterisk indicates statistically significant differences among treatments (Student's T.  
905 test,  $\alpha=0.05$ ). **(c)** Representative pictures of chitosan-induced priming of callose at the  
906 infection site. Blue colours correspond to fungal growth whereas yellow colours correspond  
907 with the callose deposition at the infection site. Scale bars= 0.5 mm. **(d)** Mass-spectrometry  
908 quantification (ng/mL) of Salicylic acid (SA), Jasmonic acid (JA) and Abscisic acid (ABA) at  
909 24h post infection. Values represent means  $\pm$  SEM (n=4). letters indicates statistically  
910 significant differences among treatments (Least Significant Differences,  $\alpha=0.05$ , n.s. = not  
911 significant).

912

913

914 **Figure 3. Transcriptome analysis of chitosan-induced resistance against *Botrytis cinerea*.**

915 **(a)** Principal component analysis (PCA) of whole transcriptional microarray at 6, 9 and 12  
916 hour post infection (hpi). **(b)** Heatmap of differentially expressed genes (2-way ANOVA  $p <$   
917 0.01, Bonferoni), clustered by expression. Profiles are shown +/- treatment with chitosan and  
918 infection with *B. cinerea* at 6, 9, 12 hpi logarithmic scale fold induced (red) or repressed  
919 (blue) compared to Water + Mock. Hierarchical clusters on expression profile are broadly  
920 classed as i, ii, iii or iv. **(c)** Venn diagram of statistically significant data set (2-way ANOVA  
921  $p < 0.01$ , Benjamin-Hochberg) of differentially expressed genes. Pairwise Student's T-test  
922 comparisons were performed (Volcano plots:  $p < 0.05$ , 2-fold cut-off) for the three test  
923 treatments (Chitosan + Mock, Water + *B. cinerea* and Chitosan + *B. cinerea*) compared to  
924 control treatment (Water + Mock) at 6, 9 and 12 hpi.

925

926 **Figure 4. Functional characterisation of ACRE genes.** (a) Chitosan-induced resistance in  
927 *Nicotiana benthamiana*. Disease lesions at 2 days post inoculation (dpi). Values represent  
928 means  $\pm$  SEM (n=18). Asterisk indicates statistically significant differences between  
929 treatments (Student's T. test,  $\alpha=0.05$ ). (b) Transient expression of constitutively active  
930 SIACRE75, SIACRE180, NbACRE75 and NbACRE180 in *N. benthamiana* against *B.*  
931 *cinerea*. Lesion size measurements were performed at 4 days post-infection (dpi). Values  
932 presented are means  $\pm$  SEM (n=6). Different letters indicate statistically significant  
933 differences (ANOVA  $p < 0.05$  followed by Tukey's Post-hoc at 4 dpi). (c) *A. thaliana*  
934 transformed overexpression stable SIACRE75, SIACRE180, NbACRE75 and NbACRE180  
935 infected with *B. cinerea*. Lesion sizes were measured at 6 days after inoculation (dpi). Values  
936 presented are means  $\pm$  SEM (n=8-16). Asterisks indicate statistically significant differences  
937 (\*  $p < 0.05$ , \*\*  $p < 0.01$ ; \*\*\*  $p < 0.001$ ).

938 **Figure S1. Chitosan-induced resistance in *Solanaceae melongena* (aubergine).** Disease  
939 lesions at 3 dpi. Values represent means  $\pm$  SEM (n=10). Different letters indicate statistically  
940 significant differences among treatments (Least Significant Differences,  $\alpha=0.05$ ).

941

942 **Figure S2. Chitosan and Switch fungicide antifungal activity against *Botrytis cinerea*.**  
943 Bars represent means of fungal growth diameter ( $\pm$  SEM, n=5) at 4 days after inoculating  
944 PDA-containing Petri dishes with 5 mm agar plugs of actively growing *B. cinerea* mycelia.  
945 Different letters indicate statistically significant differences among treatments (Least  
946 Significant Differences,  $\alpha=0.05$ )

947

948 **Figure S3. Chitosan-induced resistance is based on priming. (a)** Relative Growth Rate  
949 (RGR) per week of tomato plants 1 and 2 weeks after treatment with 0.01% chitosan. Values  
950 represent means  $\pm$  SEM (n=10). Asterisk indicates statistically significant differences among  
951 treatments (Student's T. test,  $\alpha=0.05$ ) **(b)** Mass-spectrometry quantification (% of peak area)  
952 of Jasmonic acid-isoleucine (JA-ile) at 24h post inoculation. Values represent means  $\pm$  SEM  
953 (n=4). Different letters indicate statistically significant differences among treatments (Least  
954 Significant Differences,  $\alpha=0.05$ )

955

956 **Figure S4. Validation of microarray expression results.** Expression profile obtained in the  
957 microarray (a) and in the analysis by RT-q-PCR (b) of a subset of 9 genes at 9 hpi with  
958 *Botrytis cinerea*

959

960 **Figure S5. Western Blot analysis.** Expression of proteins by immunoblot analysis of GFP-  
961 SIACRE75, GFP-SIACRE180, GFP-NbACRE75 and GFP-NbACRE180 fusion proteins in  
962 *N. benthamiana* leaves at 48 h after agroinfiltration. Expected protein sizes were (i)  
963 SIACRE75= 14.79 + 26 KDa GFP= 40.8 KDa; (ii) SIACRE180= 10.86 +26= 36.8 KDa; (iii)  
964 NbACRE180= 11.74+26= 37.7 KDa; and (iv) NbACRE75= 14.6+26= 40.7 Kda. Proteins  
965 were separated by SDS-PAGE and analysed by immunoblotting. A GFP-specific antibody  
966 was used for detection of GFP-fusion protein. Equal loading of total proteins was examined  
967 by Ponceau staining (PS). Three lanes represent 3 replicates per construct GFP-SIACRE75,  
968 GFP-SIACRE180, GFP-NbACRE75, GFP-NbACRE180, and a GFP-non-protein/ empty  
969 vector (control).

970

971 **Figure S6. Subcellular location of ACRE proteins.** Confocal microscopy observation of (a)  
972 pFlub vector as a RFP-peroxisome tagged marker, (b) nucleus mRFP marker, (c) ER mRFP  
973 marker, (d) free GFP in cytoplasm and the nucleus, (e) GFP-SIACRE75 and (f) GFP-  
974 NbACRE75 fusions in the nucleus and nucleolus, (g) GFP-SIACRE180 fusion in the ER and  
975 (h) GFP-NbACRE180 fusion in the peroxisomes.

976

977 **Figure S7. Growth analysis.** Perimeter in cm of rosettes from Arabidopsis lines  
978 overexpressing GFP-Empty vector (EV), GFP-SIACRE75, GFP-SIACRE180, GFP-  
979 NbACRE75 and GFP-NbACRE180 constructs. Values represent means  $\pm$  SEM (n=8-16). n.s  
980 = not significant differences between treatments (One-way ANOVA,  $\alpha=0.05$ )

981

982

983

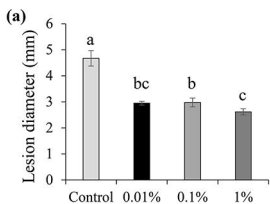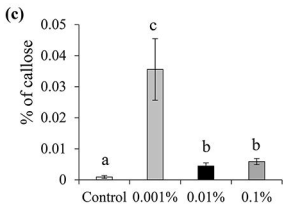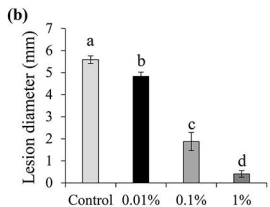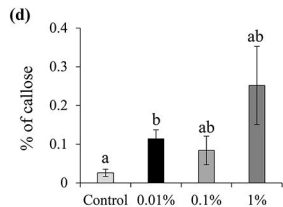

Figure 1

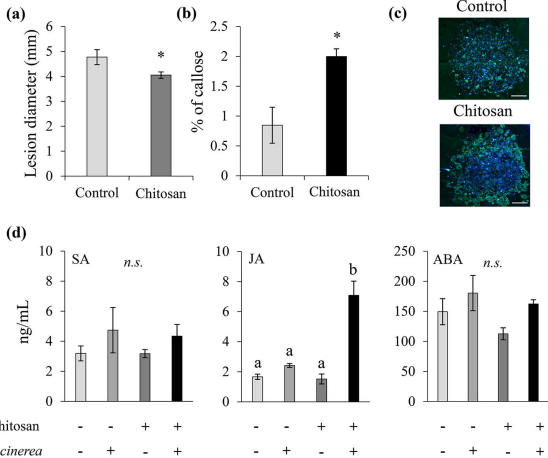

Figure 2

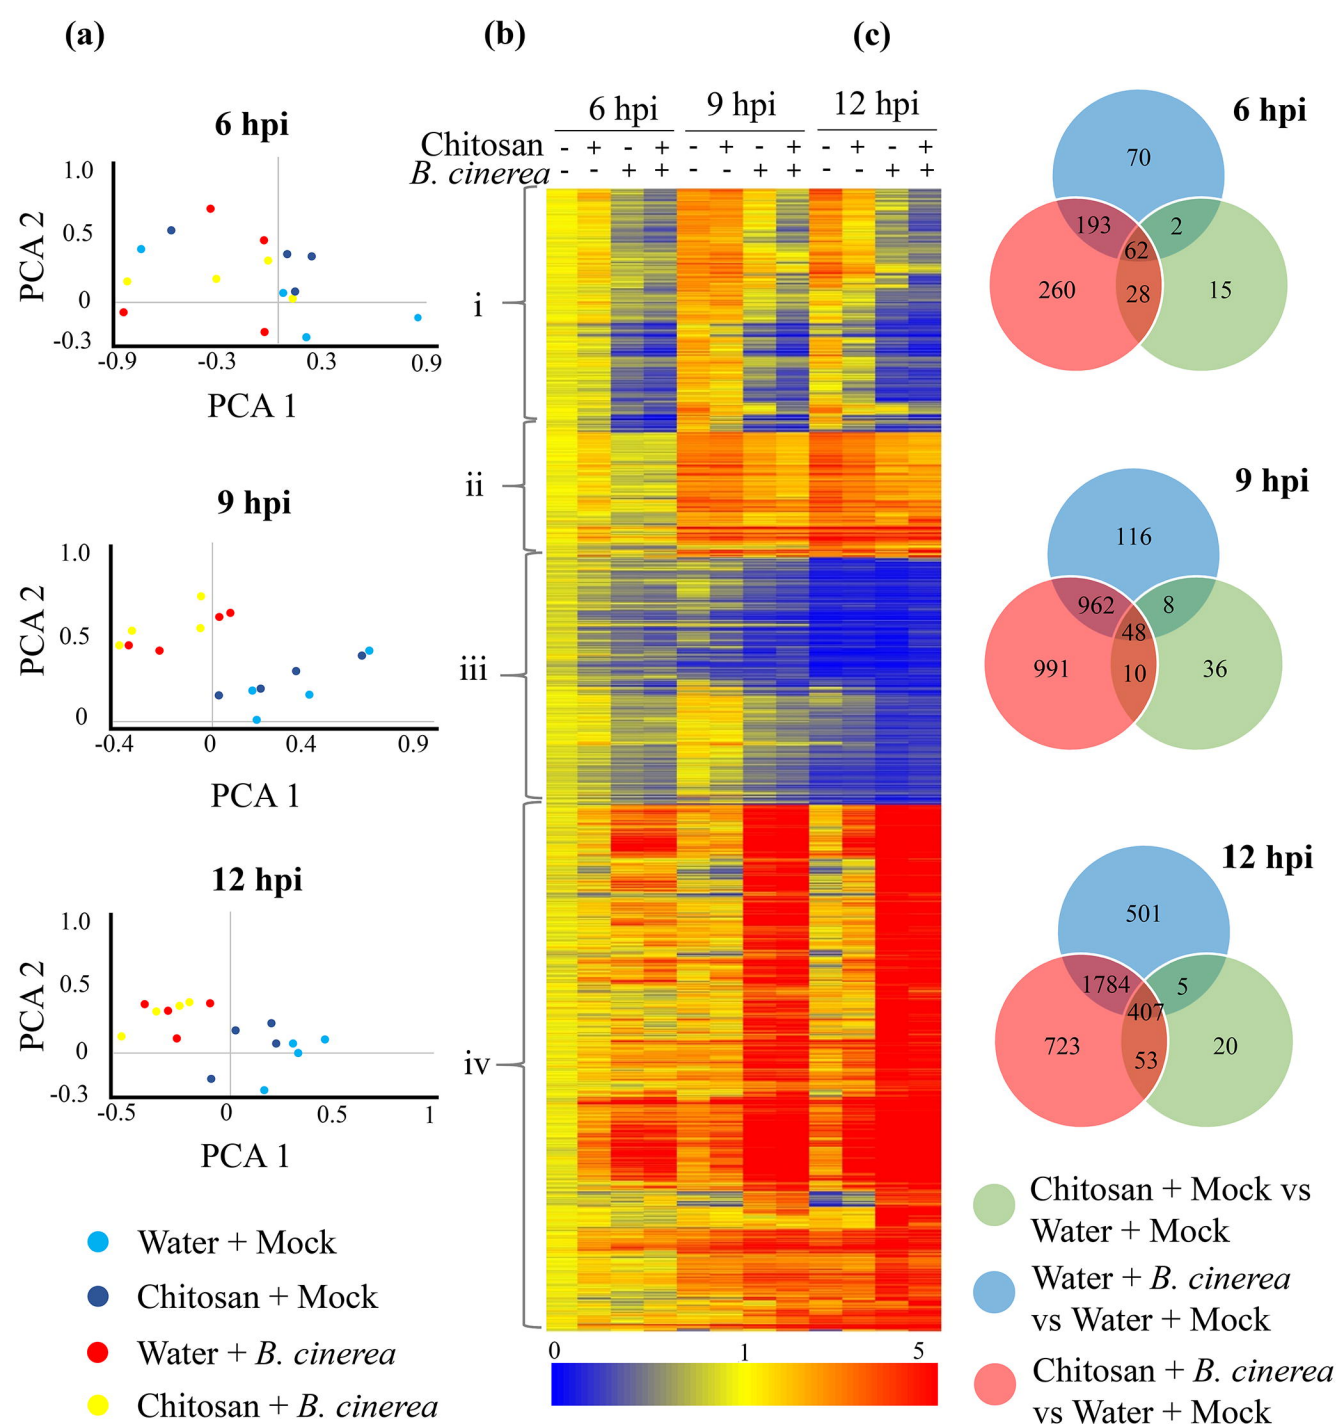

Figure 3



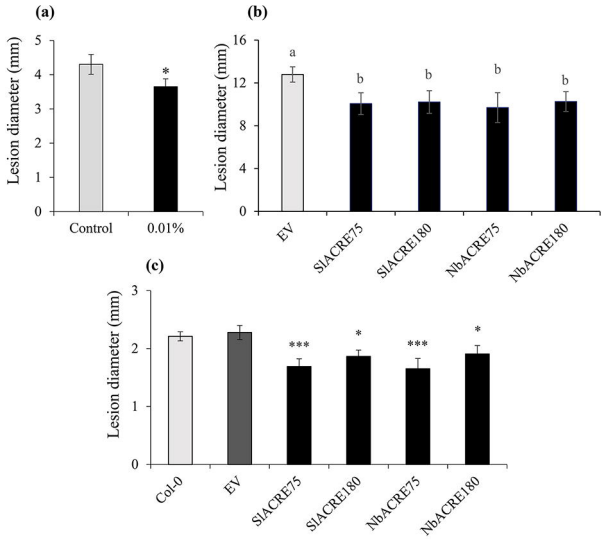

Figure 4
